1 Enzymatic synthesis of fatty acid amides using microbial lipids as acyl group-donors and their  
2 biological activities

3

4 Hatim A. El-Baz <sup>1</sup>, Ahmed M. Elazzazy <sup>2,3</sup>, Tamer S. Saleh <sup>4</sup>, Panagiotis Dritsas <sup>5</sup>, Jazem A.  
5 Mahyoub <sup>6</sup>, Mohammed N. Baeshen <sup>2</sup>, Hekmat R. Madian <sup>7</sup>, Mohammed Alkhaled <sup>2</sup> and George  
6 Aggelis <sup>2,5\*</sup>

7

8 <sup>1</sup>Department of Clinical Biochemistry, College of Medicine, University of Jeddah, Jeddah  
9 21589, Saudi Arabia.

10 <sup>2</sup>Department of Biology, College of Science, University of Jeddah, Jeddah 21589, Saudi Arabia

11 <sup>3</sup>Department of Chemistry of Natural and Microbial Products, Division of Pharmaceutical and  
12 Drug Industries, National Research Centre, Dokki, Giza 12622, Egypt

13 <sup>4</sup>Department of Chemistry, College of Science, University of Jeddah, Jeddah 21589, Saudi  
14 Arabia

15 <sup>5</sup>Unit of Microbiology, Division of Genetics, Cell and Developmental Biology, Department of  
16 Biology, University of Patras, Patras 26504, Greece

17 <sup>6</sup>Department of Biological Sciences, Faculty of Science, King Abdulaziz University, Jeddah  
18 21589, Saudi Arabia.

19 <sup>7</sup>Egyptian Petroleum Research Institute, Nasr City, Cairo 11727, Egypt

20

21 \*Corresponding author:

22 Professor George Aggelis, email address: [George.Aggelis@upatras.gr](mailto:George.Aggelis@upatras.gr)

23 Unit of Microbiology, Division of Genetics, Cell and Developmental Biology

24 Department of Biology, University of Patras

25 Patras 26504, Greece

26

27

28

29

30 Abstract

31 Fatty acid amides (FAAs) are of great interest due to their broad industrial applications. They can  
32 be synthesized enzymatically with many advantages over chemical synthesis. In this study, the  
33 fatty acid moieties of lipids of *Cunninghamella echinulata* ATHUM 4411, *Umbelopsis isabellina*  
34 ATHUM 2935, *Nannochloropsis gaditana* CCAP 849/5, Olive oil and an eicosapentaenoic acid  
35 (EPA) concentrate were converted into their fatty acid methyl esters and used in the FAA (i.e.  
36 ethylene diamine amides) enzymatic synthesis, using lipases as biocatalysts. The FAA synthesis,  
37 monitored using *in situ* NMR, FT-IR and thin-layer chromatography, was catalyzed efficiently  
38 by the immobilized *Candida rugosa* lipase. The synthesized FAAs exhibited a significant  
39 antimicrobial activity, especially those containing oleic acid in high proportions (i.e. derived  
40 from Olive oil and *U. isabellina* oil), against several human pathogenic microorganisms,  
41 insecticidal activity against yellow fever mosquito, especially those of *C. echinulata* containing  
42 gamma linolenic acid, and anti-cancer properties against SKOV-3 ovarian cancer cell line,  
43 especially those containing EPA in their structures (i.e. EPA concentrate and *N. gaditana* oil).  
44 We conclude that FAAs can be efficiently synthesized using microbial oils of different fatty acid  
45 composition and used in specific biological applications.

46

47 Keywords: Single cell oil; Fatty acid methyl esters; Fatty acid amide synthesis; Antimicrobial;  
48 Insecticidal; Anti-cancer activity

49

50 *Abbreviations: ANOVA*, Analysis of variance; *ASW*, Artificial sea water; *CLSI*, Clinical and  
51 Laboratory Standards Institute; *DHA*, Docosahexaenoic acid; *EPA*, Eicosapentaenoic acid; *FA*,  
52 Fatty acid; *FAAs*, Fatty acid amides; *FAMEs*, Fatty acid methyl esters; *FT-IR*, Fourier-transform  
53 infrared; *GLA*, Gamma linolenic acid; *LC50*, Median lethal concentration; *MBC*, Minimum  
54 bactericidal concentration; *MHA*, Mueller Hinton II Agar; *MIC*, Minimum inhibitory  
55 concentration; *NMR*, Nuclear magnetic resonance; *OPSR*, Open-pond simulating reactor; *PDA*,  
56 Potato dextrose agar; *PUFAs*, Polyunsaturated fatty acids; *SCOs*, Single cell oils; *TLC*, Thin-  
57 layer chromatography

58 Introduction

59 Fatty acid amides (FAAs) are organic compounds formed from a fatty acid (FA) and an amine,  
60 such as ethanolamine or an amino acid. FAAs can be synthesized from alkanolamine and a fatty  
61 acyl donor, such as a free FA or a FA alkyl ester, by chemical or enzymatic esterification or  
62 transesterification methods [1, 2]. The enzymatic synthesis of FAAs can be performed using  
63 lipases [3, 4], or aminoacylases [5]. FAAs are of considerable interest due to their wide-ranging  
64 industrial applications in the production of lubricants, detergents, shampoo, cosmetics and  
65 surfactant formulations [6, 7]. In addition, FAAs, demonstrating a potent antimicrobial activity  
66 against Gram-positive and Gram-negative bacteria [8] and possessing beneficial anti-  
67 inflammatory properties [9], provide an exciting opportunity to produce new medicines and  
68 nutraceuticals with applications in the treatment of several human diseases and in human  
69 nutrition [7, 10].

70         There are different sources of FAs, such as common plant oils and animal fats, which  
71 can be used in amide synthesis. Alternatively, microbial lipids, so called Single Cell Oils  
72 (SCOs), derived from microalgae and fungi, which do not compete with the food supply chain,  
73 could be considered for this purpose. Microalgae and fungi are on the forefront of  
74 biotechnological interest due to their ability to produce SCOs rich in polyunsaturated fatty acids  
75 (PUFAs) of medical and nutritional interest [11-17]. The high PUFA content of the  
76 aforementioned lipids offers an additional interest in their use as acyl group-donors in FAA  
77 synthesis, since several reports demonstrate that PUFAs or compounds containing PUFA  
78 moieties in their molecule exhibited interesting biological activities [18-20]. Among microalgae,  
79 *Nannochloropsis* is a prominent genus that include species able to efficiently grow under non-  
80 aseptic conditions and accumulate lipids rich in PUFAs, such as eicosapentaenoic acid (EPA)

81 [21, 22]. As for fungi, genera belonging to Mucoromycota (including *Mucor*, *Rhizopus*,  
82 *Umbelopsis*, *Lichtheimia*, *Cunninghamella* and *Mortierella*) are well known for their ability to  
83 synthesize PUFAs, especially gamma linolenic acid (GLA), which is of great pharmaceutical  
84 interest due to its anticancer properties, while it has been used to improve premenstrual tension  
85 and various skin diseases [13, 17]. Especially, *Cunninghamella echinulata* is an important GLA  
86 producer [13, 19, 23], while *Umbelopsis isabellina* is regarded as a promising SCO producer,  
87 being able to accumulate lipids in high percentages, though less rich in GLA [16, 24-26].

88         The aim of this study was to produce through enzymatic synthesis FAAs using as acyl  
89 group-donors SCOs of different FA composition, such as those derived from the fungi  
90 *Umbelopsis isabellina* (containing oleic acid in high percentage and GLA in low percentage) and  
91 *Cunninghamella echinulata* (containing GLA in high percentages) and the microalga  
92 *Nannochloropsis gaditana* (containing EPA in high percentages). The biological activity of the  
93 above FAAs was tested against important human pathogens, the larvae of *Aedes aegypti* and the  
94 SKOV-3 cancer cell line and compared with that of FAAs produced using as acyl group-donors  
95 Olive oil (containing oleic acid in very high percentages) and an EPA concentrate (i.e. a fish oil  
96 derivative containing EPA in very high percentages). We concluded that FAAs can be efficiently  
97 produced using lipids of microbial origin and employed as bioactive compounds in various  
98 biological applications depending on their FA composition.

99

100 Materials and methods

101 Biological materials and culture conditions

102 The fungal strains *Cunninghamella echinulata* ATHUM 4411 and *Umbelopsis isabellina*

103 ATHUM 2935 (culture collection of National and Kapodistrian University of Athens, Greece)

104 were maintained on potato dextrose agar (PDA) (Biolab Zrt, Budapest, Hungary) at  $7 \pm 1$  °C.  
105 The microalga *Nannochloropsis gaditana* CCAP 849/5 was maintained in 250-mL conical flasks  
106 containing 50 mL of artificial sea water (ASW) at  $25 \pm 1$  °C. All cultures were regularly sub-  
107 cultured.

108 Cultures of *C. echinulata* and *U. isabellina* were performed in 250-mL Erlenmeyer  
109 flasks containing 50 mL of a culture medium with the following composition (in g/L): glucose  
110 (AppliChem, Darmstadt, Germany), 60.0; KH<sub>2</sub>PO<sub>4</sub> (AppliChem), 12.0; Na<sub>2</sub>HPO<sub>4</sub> (AppliChem),  
111 12.0; CaCl<sub>2</sub>·2H<sub>2</sub>O (Carlo Erba, Rodano, Italy), 0.1; CuSO<sub>4</sub>·5H<sub>2</sub>O (BDH, Poole, England), 0.0001;  
112 Co(NO<sub>3</sub>)<sub>6</sub>H<sub>2</sub>O (Merck, Darmstadt, Germany), 0.0001; MnSO<sub>4</sub>·5H<sub>2</sub>O (Fluka, Steinheim,  
113 Germany), 0.0001; ZnSO<sub>4</sub>·7H<sub>2</sub>O (Merck), 0.001 and FeCl<sub>3</sub>·6H<sub>2</sub>O (BDH), 0.08. The medium was  
114 limited in nitrogen with yeast extract (Conda, Madrid, Spain) at 3.0 g/L being the sole nitrogen  
115 source. Yeast extract was also served as source of magnesium and ferrum according to Bellou et  
116 al. [13]. The flasks were sterilized at 121 °C for 20 min and inoculated with 1 mL of spore  
117 suspension containing 10<sup>7</sup> fungal spores produced on PDA cultures for 5 days at 28 °C.  
118 Incubation took place in an orbital shaker (ZHICHENG ZHWY 211C, Shanghai, China) at  
119 temperature  $28 \pm 1$  °C and an agitation rate of 180 rpm. pH after sterilization was  $6.5 \pm 0.5$  and  
120 remained practically stable during cultivation.

121 A modified ASW described in Dourou et al. [22] was used as growth medium for *N.*  
122 *gaditana*. Prior to sterilization pH of ASW was calibrated at  $8.5 \pm 0.5$  through the addition of 2  
123 M NaOH (Merck) solution. Microalgal cultures were performed in a laboratory-made glass  
124 bioreactor of total volume 8.7 L and working volume 5.0 L, served as an open-pond simulating  
125 reactor (OPSR) [22]. Initially, the reactor was washed with 70% ethanol and filled with 4.5 L  
126 sterilized (at 121 °C for 20 min) ASW medium. The reactor was inoculated with 500 mL of a

127 fresh inoculum containing  $10^5$  cells/mL, and incubated at temperature  $25 \pm 1$  °C under constant  
128 illumination of  $300 \mu\text{mol m}^{-2} \text{s}^{-1}$  supplied by linear fluorescent day light tubes T5, 8W, 6500k,  
129 G5. OPSR cultures were performed at temperature  $25 \pm 1$  °C and pH  $8.5 \pm 0.5$ , which was  
130 automatically controlled. Agitation was achieved through the use of a circulator, in the entryway  
131 of which natural air was provided to the culture with a gas flow rate of 30 L/h. Illumination of  
132  $245 \mu\text{mol m}^{-2} \text{s}^{-1}$  was provided by 8 W fluorescent lamps, which were placed at a distance of 20  
133 cm above the culture surface.

134

#### 135 Cell mass harvesting

136 Fungal mycelia were harvested by filtration through Whatman No. 1 paper. Microalgal cell mass  
137 was harvested by centrifugation at 24,000 g for 15 min at 4 °C (Heraeus, Biofuge Stratus,  
138 Osterode, Germany). In both cases, the collected biomass was washed twice with distilled water,  
139 dried at 80 °C until constant weight and gravimetrically determined.

140

#### 141 Lipid extraction and purification

142 Microbial lipids were extracted in chloroform: methanol (2:1, v/v) (Sigma-Aldrich) following the  
143 Folch et al. [27] method. The extracts were filtrated through Whatman No. 1 paper and washed  
144 with a KCl (Sigma-Aldrich) 0.88 % (w/v) solution to remove non-lipid components.

145 Subsequently, the solvents were dried over anhydrous  $\text{Na}_2\text{SO}_4$  (Sigma-Aldrich) and evaporated  
146 under vacuum using a Rotavapor R-20 device (BUCHI, Flawil, Switzerland). The total cellular  
147 lipids (L) were gravimetrically determined and expressed as a percentage on dry cell mass (L/x,  
148 %).

149

150 Fatty acid methyl esters preparation and gas chromatography analysis

151 The FA moieties of lipids (i.e. approx. 100 mg of microbial oils or Olive oil or EPA concentrate  
152 produced as above described) were converted into their fatty acid methyl esters (FAMES) in a  
153 two-stage reaction in accordance with the AFNOR [28] method in order to avoid trans-  
154 isomerization. Briefly, in the first stage the FAs that are esterified with glycerol were converted  
155 into FAMES and the free FAs (if present) were converted into sodium soaps in a sodium  
156 methoxide solution under reflux. Following, the resulting soaps were also converted into FAMES  
157 after adding an acetyl chloride solution in excess in the above mixture. The reaction was stopped  
158 by adding water and the FAMES were extracted in 6 mL hexane (Fluka). Finally, the organic  
159 phase was removed under vacuum and the FAME preparation was stored in dark under an argon  
160 atmosphere.

161 FAME mixtures were analysed in a gas chromatography device (Agilent 7890A device,  
162 Agilent Technologies, Shanghai, China), equipped with a flame ionization detector (working at  
163 280 °C) and a HP-88 (J&W Scientific) column (60 m × 0.32 mm). Carrier gas was helium at a  
164 flow rate 1 mL/min and the analysis was run at 200 °C. Peaks of FAMES were identified through  
165 comparison to authentic standards.

166

167 Free fatty acid preparation

168 For glycerides cleavage, 1 g of lipids was saponified in 10 mL KOH 1N ethanol solution (95%)  
169 under reflux for 1 h and 45 min. The mixture was acidified with 10 mL HCl 4 N solution and the  
170 free FAs were extracted three-times with 5 mL hexane. The organic phase was washed with  
171 distilled water until the washes were neutral and dried over anhydrous Na<sub>2</sub>SO<sub>4</sub> (Sigma). Finally,



172 the organic phase was removed under vacuum and the FFA preparation was stored under an  
173 Argon atmosphere.

174

175 Enzymatic synthesis of amides

176 The lipase-catalyzed synthesis of amides was carried out in 50-mL Erlenmeyer flasks in nearly  
177 anhydrous media using 100 mg Novozym 435 lipase (i.e. immobilized *C. antarctica* lipase,  
178 enzymatic activity  $\square$  2 Units/mg) or 100 mg lipase from *C. rugosa* (immobilized, enzymatic  
179 activity  $\square$  2 Units/mg), both purchased from Sigma Aldrich Co., St. Louis, MO, as biocatalysts.  
180 The reaction was carried out in an orbital shaker at  $40 \pm 1$  °C, 90 rpm, in 25 mL acetone (Sigma  
181 Aldrich Co.), with ethylene diamine (Acros Organics, Thermo Fisher Scientific, Waltham, MA)  
182 and FAMEs or FFAs (produced as above) as substrates, used at different molar ratios. After  
183 several preliminary experiments FAME preparations were selected as substrate. The reaction  
184 lasted until the FAME substrate was exhausted, as evidenced by TLC (see below), usually after  
185 18 h of incubation. The reaction mixture was then filtered, the solvent was removed from the  
186 filtrate by evaporation under reduced pressure and the reaction residue is partitioned in  
187 dichloromethane and distilled water (20 mL each). The organic layer, containing the synthesized  
188 amide, was washed with saturated aqueous NaCl (Sigma Aldrich Co.) (10 mL), dried over  
189 MgSO<sub>4</sub> (Sigma Aldrich Co.), gravity-filtered and the solvent removed under reduced pressure to  
190 get the crude product.

191

192 Monitoring the evolution of the reaction and product characterization

193 Thin-layer chromatography and FT-IR

194 The reaction was monitored by thin-layer chromatography (TLC) performed on precoated Merck  
195 60 GF254 silica gel plates (Merck, US) with a fluorescent indicator, and visualized under  
196 ultraviolet irradiation at 254 and 360 nm. A mixture of n-hexane: ethyl acetate (1:4) was used as  
197 eluent and the progress of the reaction monitored until the disappearance of FAME spot in the  
198 reaction mixture.

199 FT-IR spectra for FAMES and the FAA products were recorded on a Smart iTR, which  
200 is an ultrahigh-performance, versatile attenuated total reflectance sampling accessory on the  
201 Nicolet iS10 FT-IR spectrometer (Thermo Fisher Scientific). FT-IR spectra were used to confirm  
202 the formation of FAAs from FAMES, by detecting the formation of the amidic carbonyl group.

203

204 Quantitative determination of the reaction yields through *in situ* NMR monitoring

205 The percent conversion of FAMES to amides was calculated during the reaction via *in situ* NMR  
206 monitoring. In detail, the protons of methyl group of FAMES, which are present at  $\delta$  3.56 ppm,  
207 were assigned and the progress of the reaction of FAMES with ethylene diamine was monitored  
208 by  $^1\text{H}$  NMR at regular intervals of 6 h. This was achieved by drawing a sample from the reaction  
209 mixture using a 1mL syringe connected with a syringe filter of 0.22  $\mu\text{m}$  pore size, followed by  
210 evaporation of the solvent and dissolution of the residue in  $\text{CDCl}_3$ . The  $^1\text{H}$  NMR was noted a  
211 new singlet signal at  $\delta$  3.91 ppm which matched the  $-\text{CH}_2-\text{CH}_2-$  of the amine used and grew  
212 concurrently with a decline in the intensity of the methyl of ester group signals. The latter signals  
213 disappeared after 24 h for ratio of FAME: amine 1:5 indicating 100% conversion. Therefore, we  
214 succeed to calculate the % conversion via integrations of the peaks originated one from the  
215 product (p) and the other from the reactant (r) according to the formula:

216

$$\% \text{ Conversion} = \text{I}_p / (\text{I}_r + \text{I}_p)$$

217 Where  $I_p$  is the integration of the signal of the product and  $I_r$  is the integration of the signal of  
218 the reactant.

219 The physical properties and spectral data of the prepared diamides are described below.

220 Diamide of *Cunninghamella echinulata* methyl esters: Viscous liquid; black; IR ( $\nu_{\max}$ ,  $\text{cm}^{-1}$ ):

221 3266 (NH), 2924, 2853 ( $\text{CH}_2$ ), 1651 (CO amidic); Diamide of *Umbelopsis isabellina* methyl

222 esters: Liquid; dark brown; IR ( $\nu_{\max}$ ,  $\text{cm}^{-1}$ ): 3276 (NH), 2924, 2854 ( $\text{CH}_2$ ), 1663 (CO amidic);

223 Diamide of *Nannochloropsis gaditana* methyl esters: Viscous liquid; Yellow, IR ( $\nu_{\max}$ ,  $\text{cm}^{-1}$ ):

224 3266 (NH), 2925, 2854 ( $\text{CH}_2$ ), 1663 (CO amidic); Diamide of Olive oil methyl esters: Semi solid

225 material; off-white color; IR ( $\nu_{\max}$ ,  $\text{cm}^{-1}$ ): 3407 (NH), 2922, 2852 ( $\text{CH}_2$ ), 1638 (CO amidic);

226 Diamide of EPA concentrate methyl esters: Liquid material; orange color; IR ( $\nu_{\max}$ ,  $\text{cm}^{-1}$ ): 3291

227 (NH), 2959, 2925 ( $\text{CH}_2$ ), 1663 (CO amidic).

228

229 Antimicrobial evaluation of FAAs

230 The antimicrobial activity of the synthesized FAAs was tested *in vitro* using agar well diffusion

231 assay, MIC and MBC (see below) against human pathogens including the Gram-negative

232 *Escherichia coli* ATCC 25922, *Klebsiella pneumoniae* ATCC 700603, *Pseudomonas aeruginosa*

233 ATCC 15442, *Salmonella typhimurium* ATCC 14028 the Gram-positive bacteria, *Bacillus*

234 *subtilis* ATCC 6633, MRSA *Staphylococcus aureus* ATCC 4330, *Staphylococcus aureus* ATCC

235 25923 and the unicellular fungus *Candida albicans* ATCC 10221.

236

237 Agar well diffusion assay

238 Fresh bacterial cultures grown on nutrient agar for 20 h at 37 °C were suspended in a saline

239 solution (0.85%, w/v) to a turbidity of 0.5 Mac-Farland standards. Then 100  $\mu\text{l}$  ( $10^6$  CFU/mL)

240 of each bacterial suspension was swabbed onto Mueller Hinton II Agar (MHA) plates. 6 mm  
241 diameter wells were punched on the MHA and inside the wells 100  $\mu$ l of FAAs solution was  
242 poured. The plates were preincubated in a refrigerator (at T=4  $^{\circ}$ C) for 1 h and then incubated  
243 overnight at 37  $^{\circ}$ C, in order to allow the FAAs diffusion into the agar. The diameter of the  
244 inhibition zones were measured in mm using Clinical and Laboratory Standards Institute (CLSI)  
245 guidelines. Experiments were done in triplicate.

246

247 Evaluation of minimum inhibitory concentration (MIC) and minimum bactericidal concentration  
248 (MBC) values for FAAs

249 MICs were determined according to the CLSI broth microdilution method [29]. One hundred  
250 microliters of the Mueller Hinton broth medium were distributed into the wells of the micro titer  
251 plates. A FAA solution (10  $\mu$ L), serial diluted from stock solutions to achieve 200, 100, 50, 25,  
252 12.5 and 6.25  $\mu$ g/mL, was added to the well together with one hundred microliters of bacterial  
253 suspension ( $6 \times 10^6$  CFU). The microwell plates were incubated at 37  $^{\circ}$ C for 24 h, then 5  $\mu$ l of  
254 a resazurin solution (6.75 mg/mL) was added to each well and the plates incubated at 37  $^{\circ}$ C for  
255 another 4 h. Changes of color indicating cell viability were recorded. The bacterial growth was  
256 measured using a Bio-Rad Microplate Reader at 600 nm. MIC was determined as the lowest  
257 concentration of FAAs that inhibit visible growth of the tested microorganism. MBC was the  
258 lowest FAA concentration resulting in microbial death. It was determined by sub-culturing cells  
259 from wells that exhibited no color change to sterile MHA plates. All experiments were carried  
260 out in triplicate.

261

262 Larval bioassay

263 Tests were performed on a field strain of *Aedes aegypti* raised from wild larvae, collected from  
264 Jeddah, Saudi Arabia, and maintained in the laboratory under controlled conditions of  $27 \pm 1$  °C  
265 and  $70 \pm 5\%$  R.H., with a 14:10 (L:D) photoperiod. The standard World Health Organization  
266 larval susceptibility test method was used. Treatments were carried out by exposing early 4<sup>th</sup>  
267 instar larvae of *A. aegypti* to various concentrations of the tested compounds for 48 h, in groups  
268 of glass beakers containing 100 mL of a FAA solution in tap water. Five replicates per FAA  
269 concentration of 20 larvae each, and so for control trials, were set up. The larvae were given the  
270 usual larval food during these experiments. Larval mortalities were recorded at 48 h post-  
271 treatment. Log concentration-probability regression lines were drawn for the tested compounds.  
272 Statistical parameters were calculated using the method of Finney [30].

273

274 Quantitative analysis of cell apoptosis by flow cytometry

275 The apoptotic activity of the SKOV-3 ovarian cancer cell line in response to tested compounds  
276 was determined by Annexin FITC, as per the manufacturer's instructions (BD Biosciences,  
277 USA). Briefly, the SKOV-3 cells were grown in a 25-mL flask at a density of  $3 \times 10^5$  cells/well.  
278 The induction of apoptosis was investigated in untreated and treated SKOV-3 cells with  
279 curcuminoids at a concentration of 30  $\mu$ M for 48h. After harvesting by trypsinization and  
280 washing with PBS, the cells were stained with 5  $\mu$ L Annexin FITC, incubated for 15 min in the  
281 dark and then immediately analyzed using a FACS flow cytometer (BD FACSAria™ II - BD  
282 Biosciences) using BD FACSDiva™ Software (BD Biosciences, USA).

283

284 Statistical analysis

285 The acquired data were analyzed using SPSS 9.0 and the results were given as mean  $\pm$  SD of  
286 three replicates. The mean comparison between the various assessed groups was performed using  
287 one-way analysis of variance (ANOVA). Statistical significance was defined when  $p < 0.05$ .

288

289 Results and discussion

290 Lipid production and FA composition

291 Two oleaginous fungi, i.e. *C. echinulata* and *U. isabellina*, as well as the marine microalgae *N.*  
292 *gaditana*, were selected for this study thanks to their ability to accumulate PUFA-containing  
293 lipids.

294 *C. echinulata* has been recognized as a great GLA producer cultivated in sugar-based  
295 media with high C/N ratio [31] while, *U. isabellina* is known for its capability to accumulate  
296 lipids in high quantities [32-34]. In this study, *C. echinulata* produced significant quantities of  
297 biomass and cellular lipids (i.e. 12.9 g/L of dry biomass containing 30.0% w/w lipids) while *U.*  
298 *isabellina* accumulated 74% of lipids in its dry biomass, both cultivated in a mineral medium  
299 with glucose as the sole source of carbon and energy (Table 1). GLA was found in considerable  
300 concentration in *C. echinulata* lipids, representing 12.8% of total FAs (Table 2). However, the  
301 major FA in these lipids was oleic (C18:1) (with a percentage of 44%), followed by palmitic  
302 (C16:0) and linoleic (C18:2) acids. Concerning the FA profile of *U. isabellina*, C18:1 was the  
303 dominant FA, found up to 54.4% in total lipids, while C16:0 and C18:2 were also found at  
304 significant percentages. GLA percentages were low (i.e. 2.6%) in the lipids of *U. isabellina*.  
305 Chatzifragkou *et al.* [35] reported slightly higher GLA percentages in the lipids of both strains  
306 compared to the current study. It seems that several factors, such as the carbon source, affect  
307 lipid FA composition. For instance, Fakas *et al.* [36], studying the effect of different carbon

308 sources on growth and lipid accumulation rates of *C. echinulata* and *U. isabellina*, reported that  
309 xylose, in contrast to glucose, induced lipid accumulation and GLA biosynthesis.

310 In the last few decades, the interest in microalgae as PUFA producers is constantly  
311 increasing. Biomass production and lipid accumulation of *N. gaditana* cultivated in ASW under  
312 constant illumination, were satisfying (i.e. 313.9 mg/L and 22.7%, respectively) and in  
313 accordance with data reported by Dourou et al. [22]. The predominant FA was EPA, found at a  
314 percentage of 25% in the total FAs, followed by the monounsaturated palmitoleic (C16:1) and  
315 C18:1 acids (Table 2). Dourou et al. [22] reported that the same strain cultivated on different  
316 bioreactor configurations, was able to synthesize myristic acid (C14:1) too, which can be utilised  
317 in a wide variety of applications in the cosmetics industry. The unsaturated FA content, though,  
318 could potentially be increased by optimizing the growth conditions and/or by using genetically  
319 modified strains.

320

### 321 Optimization of the FAA synthesis

322 Initially, the conditions of the amidation reaction (Fig. 1) were optimized by taking the Olive oil  
323 FAMES as a model substrate. The reaction, the progress of which was monitored by TLC, has  
324 been done for 24 h at 40 °C with shaking at 90 rpm utilizing acetone as a solvent in the presence  
325 of immobilized lipase as a catalyst. The % conversion, which was taken as a criterion for  
326 determining the optimum conditions, was quantified via *in situ* NMR monitoring (Fig. 2).  
327 Besides, FT-IR analysis (Fig. 3) gave a reliable evidence for amide formation due to the  
328 appearance of a band at 1638 cm<sup>-1</sup>, corresponding to the carbonyl of amide, in parallel with the  
329 disappearance of the band at 1743 cm<sup>-1</sup>, due to the consumption of the carbonyl group of  
330 FAMES. In addition, amide formation is confirmed by the appearance of a broadband at 3403

331  $\text{cm}^{-1}$  due to NH, which in line with the amide structure 4 and rule out the formation of structure 3  
332 due to the absence of the amino group  $\text{NH}_2$  band (Fig. 1).

333 Two immobilized lipases, namely Novozym 435 and lipase from *C. rugosa* (Lipase CR)  
334 were used as catalysts for the reaction of Olive oil FAMES with ethylene diamine (Table 3). The  
335 conversion yield was only 12% in the absence of a catalyst (entry 9, Table 3), confirming the  
336 importance of lipases in FAA synthesis. Wang et al. [2, 3] proved that even in the absence of a  
337 catalyst amidation can be performed but at high temperature and long reaction times, conditions  
338 that create undesired product quality. Additionally, it was demonstrated that, under the  
339 conditions of the present experimental work, the immobilized lipase Novozym 435 showed  
340 lower conversion yield (entries 1-4, Table 3) than the Lipase CR (entries 5-8, Table 3).  
341 Immobilized enzymes have the advantage over free enzymes to be easily recycled, providing  
342 sustainability to the process, and for this reason several researchers proposed the employment of  
343 immobilized lipases as catalysts for FAA synthesis [37-39]. In the current work the reusability of  
344 the Lipase CR was checked for several reaction cycles for the synthesis of amide of Olive oil  
345 FAMES under the optimized reaction conditions. Specifically, the enzyme was removed after the  
346 completion of the reaction by filtration, washed with ethanol solvent in a Soxhlet extraction  
347 apparatus and the recovered enzyme was reused for three times under the same reaction  
348 conditions. It was found that the regenerated enzyme performed the reaction efficiently without  
349 loss of its catalytic activity. Similarly, according to Khare et al. [8], Novozym 435 could be  
350 repeatedly used without any decrease of its catalytic activity, while Sharma et al. [40] have  
351 demonstrated six repeated cycles of reusability of Chirazyme L-2 used to synthesize secondary  
352 amide surfactant from N-methylethanol amine.



353 Previously, Wang et al. [2] showed that the molar ratio of vinyl stearate to ethanolamine  
354 has affected the synthesis and purity of N-stearoyl ethanolamine produced. Thus, in the present  
355 research different molar ratios of Olive oil FAMES: ethylene diamine were tested (Table 3, Fig.  
356 4). The amine rather than the FAME concentration in the reaction medium affected the  
357 conversion yield of Olive oil FAMES to amide. The maximum conversion yield (i.e. 100 %) was  
358 attained with Lipase CR and a ratio of Olive oil FAMES: ethylene diamine 1:5 (Table 3, entry 8).  
359 These results are almost similar with those reported by Liu et al. [41] who, studying the effect of  
360 the FA: diethanolamine ratio on the lipase-catalyzed amidation, showed that the maximum amide  
361 yield was achieved at a low ratio 1:4.

362 The reaction conditions were further optimized using the immobilized Lipase CR as a  
363 catalyst in different quantities and the reaction progress was monitored by TLC. It was found that  
364 a 100% conversion yield was obtained in the shortest reaction time when 0.1 g of the Lipase CR  
365 was employed (Table 4, entry 2), while a higher enzyme quantity was not necessary. Wang et al.  
366 [3] reported that the yield of the amidation reaction increased when lipase concentration  
367 increased from 10 to 20% of the total reactants.

368 Due to the nature of the reactants organic solvents were used by many researchers as a  
369 suitable medium for the production of FAAs (see for instance [41, 42]). In the current paper  
370 when acetone was used as a solvent the duration of the reaction was shorter than when *t*-butyl  
371 alcohol and isoamyl alcohol were employed (entries 2, 4, 5, Table 4). Acetone is an  
372 environmentally benign and low toxicity solvent, previously used as the best solvent for  
373 polyunsaturated FAA synthesis [43].

374 Following optimization of the amidation reaction FAAs were produced using FAMES of  
375 SCOs from *C. echinulata*, *U. isabellina* and *N. gaditana* and of EPA concentrate oil (Table 5).

376 The conversion yields of the above reactions were excellent, reaching the values of 90-100%  
377 (Table 5). The structures of the obtained FAAs were confirmed on the basis of their FT-IR  
378 spectra in which appearance of the broadband due to NH group and of carbonyl group of amides  
379 was observed (see for instance Fig. 5, 6 and original spectra in Fig. S1-S5). These results are in  
380 agreement with Mudiyansele et al. [44] who showed that microalgal lipids can be converted  
381 into FAAs in a two-step reaction, including transesterification to form FAMES followed by  
382 amidation. The synthesis of amide in this work is efficient and its potential application on a large  
383 scale will not interfere with the food supply chain, since SCOs are alternative sources to the  
384 traditional sources of PUFAs.

385

386 Antimicrobial activity of amide compounds

387 FAAs derived from FAMES of *C. echinulata*, *U. isabellina*, *N. gaditana* SCOs, Olive oil and  
388 EPA concentrate were tested against various human pathogens for their antimicrobial efficacy by  
389 the agar well diffusion method, which resulted in the formation of a variable diameter zone of  
390 inhibition (Table 6). Except for MRSA *Staphylococcus aureus*, which is inhibited only by *N.*  
391 *gaditana*-FAAs, Olive oil-FAAs and EPA-FAAs, all tested pathogens were significantly  
392 inhibited by all FAAs produced in this work. *U. isabellina*-FAA was probably the most efficient  
393 preparation against all pathogens, except for MRSA *Staphylococcus aureus*. On the contrary, *C.*  
394 *echinulata*-FAAs seemed to be less efficient than *U. isabellina*-FAAs against all pathogens  
395 (statistically significant at  $p < 0.05$ ). *N. gaditana*-FAAs successfully inhibited all tested  
396 organisms, except for *Bacillus subtilis* ATCC 6633 in the culture of which the inhibition zone  
397 was only  $9.00 \pm 0.00$  mm. The inhibition demonstrated by *N. gaditana*-FAAs against  
398 *Staphylococcus aureus* ATCC 25923 and *Candida albicans* ATCC 10221 was similar to that

399 observed when *U. isabellina*-FAAs were employed. The Olive oil-FAAs showed a significant  
400 inhibitory activity against all tested organisms, especially against *Pseudomonas aeruginosa*  
401 ATCC 15442 and *Candida albicans* ATCC 10221 presenting an inhibition zone,  $17.67 \pm 0.57$   
402 mm and  $18.07 \pm 0.11$  mm, respectively. Finally, EPA-FAAs showed a high antimicrobial  
403 activity against all tested organisms specifically against *Staphylococcus aureus* (both strains) and  
404 *Pseudomonas aeruginosa* ATCC 15442 (i.e. inhibition zone around 20 mm).

405 The results of MIC and MBC determined for selected pathogens (Table 7) were in line  
406 with those obtained by the agar diffusion method. In detail, all tested pathogenic strains are  
407 sensitive to the *U. isabellina*-FAAs, while *C. echinulata*-FAAs are less effective. For *N.*  
408 *gaditana*-FAAs, the highest MIC observed was 200  $\mu\text{g/mL}$  and this was against *Bacillus subtilis*  
409 ATCC 6633, while the other pathogens tested were much more sensitive. All strains are sensitive  
410 to FAAs derived from Olive oil, especially *Bacillus subtilis* ATCC 6633 and *Pseudomonas*  
411 *aeruginosa* ATCC 15442 in which MIC was only 25  $\mu\text{g/mL}$ . Besides, the FAAs derived from  
412 EPA concentrate significantly affected the growth of all the tested bacteria particularly of  
413 *Bacillus subtilis* ATCC 6633 and *Klebsiella pneumoniae* ATCC 700603. With few exceptions  
414 (case of EPA-FAAs) the MBC was estimated to be 100-200  $\mu\text{g/mL}$ .

415 The results reported in this paper are in agreement with previous reports in which  
416 various FAAs have been used as potential antimicrobial agents [7]. Khare et al. [8] showed that  
417 FAAs possess a strong antimicrobial activity towards Gram-positive (such as *Bacillus subtilis*  
418 and *Staphylococcus aureus*) and Gram-negative (such as *Proteus vulgaris* and *Klebsiella*  
419 *pneumoniae*) bacteria. Concerning the mechanism of action of FAAs Novak et al. [45] observed  
420 that FAAs containing an epoxy group exhibit a broad spectrum of antimicrobial activity, which  
421 is further enhanced by unsaturation. Later, Stevens and Hofmeyr [46] indicated a disturbance in

422 the FA constituents of the cell plasma membrane which interferes with the proper membrane  
423 functions leading to the loss of the integrity of the plasma lemma. This suggestion was further  
424 strengthened by Shao *et al.* [47] who worked on the mechanism of action of oleamide observed  
425 that this compound caused alterations in the FA composition of the cell membranes. In this paper  
426 FAAs prepared using FAMES rich in oleic acid (i.e. Olive oil-FAAs and *U. isabellina*-FAAs)  
427 were more effective against pathogens than those prepared from FAMES contained oleic acid in  
428 lower concentration (i.e. *C. echinulata*-FAAs). Unexpectedly, the presence of GLA in the lipids  
429 of *C. echinulata* did not improve the antimicrobial activity of *C. echinulata*-FAAs compared to  
430 *U. isabellina*-FAAs. *N. gaditana*-FAAs and EPA-FAAs, although containing oleic acid in very  
431 low concentrations, are both effective against all tested bacteria, and therefore their activity may  
432 be attributed to their high EPA content.

433

434 Insecticidal activity assay of amide compounds

435 The yellow fever mosquito (*Aedes aegypti*) spreads dangerous human arboviruses that include  
436 dengue, Zika, and chikungunya. Therefore, control of yellow fever mosquitoes is a critical public  
437 health priority [48]. Chemical insecticides are a leading method of control, but they are  
438 expensive, contribute to the development of insecticidal resistance, pose risks to the environment  
439 and cause safety concerns to humans and non-target animal species.

440 The susceptibility of *Aedes aegypti* larvae to FAAs under laboratory conditions was  
441 tested using dipping methods. The larvicidal activity of a product is usually improved by  
442 increasing its concentration and exposure time [49]. Many FA-derived products manifest toxicity  
443 to different mosquito species larvae [50, 51], and have been proposed as alternatives to  
444 conventional mosquito larvicides. Komalamisra et al. [52] considered larvicidal compounds

445 exerting  $LC_{50} < 50$  mg/L active,  $50 \text{ mg/L} < LC_{50} < 100$  mg/L moderately active,  
446  $100 \text{ mg/L} < LC_{50} < 750$  mg/L effective, and  $LC_{50} > 750$  mg/L inactive. Kiran et al. [53]  
447 considered compounds with  $LC_{50} < 100$  mg/L as exhibiting a significant larvicidal effect. In  
448 the current study, *C. echinulata*-FAAs showed a strong insecticidal activity against *A. aegypti*  
449 larvae with  $LC_{50}$  0.3 mg/L, which could be probably attributed to the presence of GLA in  
450 significant concentrations, while Olive oil-FAAs, EPA-FAAs and *N. gaditana*-FAAs exhibited  
451 active insecticidal effect, demonstrating  $LC_{50}$  18.3, 20.5 and 34.3 mg/L, respectively. Contrary,  
452 *U. isabellina*-FAAs were less active, presenting a  $LC_{50}$  equal to 132.1 mg/L (Table 8, Fig. 7).  
453 Many bioactive substances, such as plant essential oils [54, 55], FAs [56] and cyanobacterial  
454 extracts [57, 58], have been tested against *A. aegypti* larvae. According to our knowledge, this is  
455 the first report demonstrating a larvicidal activity of FAAs, in contrast with numerous works  
456 dealing with plant-based derivatives [59].

457  
458 Cell apoptosis of ovarian cancer cell line induced by FAAs  
459 The results show that all FAAs produced in this work can induce apoptosis of the SKOV-3  
460 ovarian cancer cell line. Higher percentage of apoptosis was observed in the cells treated with *N.*  
461 *gaditana*-FAAs followed by EPA-FAAs, Olive oil-FAAs and *C. echinulata*-FAAs (i.e. 61.7,  
462 54.7, 52.7 and 50.4, respectively). The results are presented in Fig. 8.

463 Santos et al. [60] suggested that the antiproliferative activity is influenced by the  
464 structural variation in the FAAs. Several studies have shown that intake of EPA, the main FA of  
465 *Nannochloropsis* sp. may play a role in the prevention of the development of different type of  
466 cancer [61]. Particularly, EPA and DHA have been investigated as potential dietary-based agents  
467 for breast cancer prevention [62], and they have been shown to exhibit multiple anticancer

468 mechanisms of action, including the alteration of cell signaling [63], inhibition of cell  
469 proliferation [64], inflammation [65], metastasis [64, 65], as well as induction of apoptosis [64,  
470 66]. Studies with synthetic FAAs showed antiproliferative activity against several tumor cells  
471 [67] and therefore these amide mediators may provide promising new agents, active against  
472 inflammatory and cancer diseases [68]. It seems that variation in the FA moieties on groups  
473 attached to the nitrogen atom may be responsible for differences in antiproliferative profiles [69].

474

#### 475 Conclusions

476 FAMEs derived from SCOs of different origin and FA composition can be used in FAA  
477 (diamide) enzymatic synthesis catalyzed by immobilized lipases, such as the *Candida rugosa*  
478 lipase. The reaction of FAA synthesis can be completed under environmentally friendly  
479 conditions in 24 h, while both the solvent (acetone) and the enzyme can be recycled. The  
480 biological activities (antimicrobial, insecticidal activity, anti-cancer) of the synthesized FAAs are  
481 related, partially at least, to their FA profile. Therefore, we conclude that oleaginous  
482 microorganisms, able of synthesizing a wide range of FAs, can be considered in the near future  
483 as source FAs suitable for producing FAAs of different biological activities.

484

#### 485 Author agreement

486 Hatim A. El-Baz, Ahmed M. Elazzazy, Tamer S. Saleh, Panagiotis Dritsas, Jazem A. Mahyoub,  
487 Mohammed N. Baeshen, Hekmat R. Madian, Mohammed Alkhaled and George Aggelis have all  
488 agreed to submission.

489

490 Acknowledgments

491 This work was funded by the *University of Jeddah*, Saudi Arabia, under grant No. (UJ-06-18-  
492 ICP). The authors, therefore, acknowledge with thanks the University technical and financial  
493 support.

494

495 Compliance with Ethical Standards

496 Conflict of Interest

497 The authors declare that there are no conflicts of interest.

498

499 References

- 500 1. Plastina, P., Meijerink, J., Vincken, J. P., Gruppen, H., Witkamp, R., & Gabriele, B. (2009).  
501 Selective synthesis of unsaturated N-acylethanolamines by lipase-catalyzed N-acylation of  
502 ethanolamine with unsaturated fatty acids. *Letters in Organic Chemistry*, 6(6), 444–447.  
503 <https://doi.org/10.2174/157017809789124885>.
- 504 2. Wang, X., Wang, T., & Wang, X. (2012). An improved method for the synthesis of N-stearoyl  
505 and N-palmitoylethanolamine. *Journal of the American Oil Chemists' Society*, 89, 1305–1313.  
506 <https://doi.org/10.1007/s11746-012-2017-y>.
- 507 3. Wang, X., Wang, X., & Wang, T. (2012). Synthesis of oleoylethanolamide using lipase.  
508 *Journal of Agricultural and Food Chemistry*, 60(1), 451–457.  
509 <https://doi.org/10.1021/jf203629w>.
- 510 4. Dettori, L., Jelsch, C., Guiavarc'h, Y., Delaunay, S., Framboisier, X., Chevalot, I., & Humeau,  
511 C. (2018). Molecular rules for selectivity in lipase-catalysed acylation of lysine. *Process*  
512 *Biochemistry*, 74, 50–60. <https://doi.org/10.1016/j.procbio.2018.07.021>.
- 513 5. Bourkaib, M. C., Delaunay, S., Framboisier, X., Hôtel, L., Aigle, B., Humeau, C., Guiavarc'h,  
514 Y., & Chevalot, I. (2020). N-acylation of L-amino acids in aqueous media: evaluation of the  
515 catalytic performances of *Streptomyces ambofaciens* aminoacylases. *Enzyme and Microbial*  
516 *Technology*, 137, 109536. <https://doi.org/10.1016/j.enzmictec.2020.109536>.
- 517 6. D. Adlercreutz, P. Tufvesson, Karlsson, A., & Hatti-Kaul, R. (2010). Alkanolamide  
518 biosurfactants: techno-economic evaluation of biocatalytic versus chemical production.  
519 *Industrial Biotechnology*, 6(4), 204–211. <https://doi.org/10.1089/ind.2010.6.204>.



- 520 7. Tanvir, R., Javeed, A., & Rehman, Y. (2018). Fatty acids and their amide derivatives from  
521 endophytes: new therapeutic possibilities from a hidden source. *FEMS Microbiology Letters*,  
522 365(12), fny114. <https://doi.org/10.1093/femsle/fny114>.
- 523 8. Khare, S. K., Kumar, A., & Kuo, T. M. (2009). Lipase-catalyzed production of a bioactive  
524 fatty amide derivative of 7,10-dihydroxy-8(E)-octadecenoic acid. *Bioresource Technology*,  
525 100(3), 1482–1485. <https://doi.org/10.1016/j.biortech.2008.08.011>.
- 526 9. Dang, H. T., Kang, G. J., Yoo, E. S., Hong, J., Choi, J. S., Kim, H. S., Chung, H. Y., & Jung,  
527 J. H. (2011). Evaluation of endogenous fatty acid amides and their synthetic analogues as  
528 potential anti-inflammatory leads. *Bioorganic & Medicinal Chemistry*, 19(4), 1520–1527.  
529 <https://doi.org/10.1016/j.bmc.2010.12.046>.
- 530 10. Meijerink, J., Balvers, M., & Witkamp, R. (2013). N-acyl amines of docosahexaenoic acid  
531 and other n–3 polyunsaturated fatty acids—from fishy endocannabinoids to potential leads. *British*  
532 *Journal of Pharmacology*, 169(4), 772–783. <https://doi.org/10.1111/bph.12030>.
- 533 11. Arjuna, A. (2014). Production of polyunsaturated fatty acids by fungi: a review. *International*  
534 *Journal of Pharma and Bio Sciences*, 5(3), 931–954.
- 535 12. Bellou, S., Baeshen, M. N., Elazzazy, A. M., Aggeli, D., Sayegh, F., & Aggelis, G. (2014).  
536 Microalgal lipids biochemistry and biotechnological perspectives. *Biotechnology Advances*,  
537 32(8), 1476–1493. <https://doi.org/10.1016/j.biotechadv.2014.10.003>.
- 538 13. Bellou, S., Triantaphyllidou, I. E., Aggeli, D., Elazzazy, A. M., Baeshen, M. N., & Aggelis,  
539 G. (2016). Microbial oils as food additives: recent approaches for improving microbial oil

- 540 production and its polyunsaturated fatty acid content. *Current Opinion in Biotechnology*, 37, 24–  
541 35. <https://doi.org/10.1016/j.copbio.2015.09.005>.
- 542 14. Athenaki, M., Gardeli, C., Diamantopoulou, P., Tchakouteu, S. S., Sarris, D., Philippoussis,  
543 A., & Papanikolaou, S. (2018). Lipids from yeasts and fungi: physiology, production and  
544 analytical considerations. *Journal of Applied Microbiology*, 124(2), 336–367.  
545 <https://doi.org/10.1111/jam.13633>.
- 546 15. Kavadia, A., Komaitis, M., Chevalot, I., Blanchard, F., Marc, I., & Aggelis, G. (2001). Lipid  
547 and  $\gamma$ -linolenic acid accumulation in strains of zygomycetes growing on glucose. *Journal of the*  
548 *American Oil Chemists' Society*, 78(4), 341-346. <https://doi.org/10.1007/s11746-001-0266-3>.
- 549 16. Papanikolaou, S., & Aggelis, G. (2019). Sources of microbial oils with emphasis to  
550 *Mortierella (Umbelopsis) isabellina* fungus. *World Journal of Microbiology and Biotechnology*,  
551 35, 63. <https://doi.org/10.1007/s11274-019-2631-z>.
- 552 17. Kothri, M., Mavrommati, M., Elazzazy, A. M., Baeshen, M. N., Moussa, T. A. A., &  
553 Aggelis, G. (2020). Microbial sources of polyunsaturated fatty acids (PUFAs) and the prospect  
554 of organic residues and wastes as growth media for PUFA-producing microorganisms. *FEMS*  
555 *Microbiology Letters*, 367(5), fnaa028. <https://doi.org/10.1093/femsle/fnaa028>.
- 556 18. Mozaffarian, D., & Wu, J. H. Y. (2011). Omega-3 fatty acids and cardiovascular disease:  
557 effects on risk factors, molecular pathways, and clinical events. *Journal of the American College*  
558 *of Cardiology*, 58(20), 2047–2067. <https://doi.org/10.1016/j.jacc.2011.06.063>.
- 559 19. Alakhras, R., Bellou, S., Fotaki, G., Stephanou, G., Demopoulos N. A., Papanikolaou, S., &  
560 Aggelis, G. (2015). Fatty acid lithium salts from *Cunninghamella echinulata* have cytotoxic and

- 561 genotoxic effects on HL-60 human leukemia cells. *Engineering in Life Sciences*, 15(2), 243–253.  
562 <https://doi.org/10.1002/elsc.201400208>.
- 563 20. Sayegh, F., Elazzazy, A., Bellou, S., Moustogianni, A., Elkady, A. I., Baeshen, M. N., &  
564 Aggelis, G. (2016). Production of polyunsaturated single cell oils possessing antimicrobial and  
565 anticancer properties. *Annals of Microbiology*, 66, 937–948. [https://doi.org/10.1007/s13213-](https://doi.org/10.1007/s13213-015-1176-0)  
566 [015-1176-0](https://doi.org/10.1007/s13213-015-1176-0).
- 567 21. Bellou, S., & Aggelis, G. (2012). Biochemical activities in *Chlorella* sp. and  
568 *Nannochloropsis salina* during lipid and sugar synthesis in a lab-scale open pond simulating  
569 reactor. *Journal of Biotechnology*, 164(2), 318–329.  
570 <https://doi.org/10.1016/j.jbiotec.2013.01.010>.
- 571 22. Dourou, M., Tsolcha, O. N., Tekerlekopoulou, A. G., Bokas, D., & Aggelis, G. (2018). Fish  
572 farm effluents are suitable growth media for *Nannochloropsis gaditana*, a polyunsaturated fatty  
573 acid producing microalga. *Engineering in Life Sciences*, 18(11), 851–860.  
574 <https://doi.org/10.1002/elsc.201800064>.
- 575 23. Bellou, S., Moustogianni, A., Makri, A., & Aggelis, G. (2012). Lipids containing  
576 polyunsaturated fatty acids synthesized by zygomycetes grown on glycerol. *Applied*  
577 *Biochemistry and Biotechnology*, 166, 146–158. <https://doi.org/10.1007/s12010-011-9411-z>.
- 578 24. Ruan, Z., Hollinshead, W., Isaguirre, C., Tang, Y. J., Liao, W., & Liu, Y. (2015). Effects of  
579 inhibitory compounds in lignocellulosic hydrolysates on *Mortierella isabellina* growth and  
580 carbon utilization. *Bioresource Technology*, 183, 18–24.  
581 <https://doi.org/10.1016/j.biortech.2015.02.026>.

- 582 25. Harde, S. M., Wang, Z., Horne, M., Zhu, J. Y., & Pan, X. (2016). Microbial lipid production  
583 from SPORL-pretreated Douglas fir by *Mortierella isabellina*. *Fuel*, 175, 64–74.  
584 <https://doi.org/10.1016/j.fuel.2016.02.023>.
- 585 26. Gardeli, C., Athenaki, M., Xenopoulos, E., Mallouchos, A., Koutinas, A. A., Aggelis, G., &  
586 Papanikolaou, S. (2017). Lipid production and characterization by *Mortierella (Umbelopsis)*  
587 *isabellina* cultivated on lignocellulosic sugars. *Journal of Applied Microbiology*, 123(6), 1461–  
588 1477. <https://doi.org/10.1111/jam.13587>.
- 589 27. Folch, J., Lees, M., & Stanley, G.H.S. (1957). A simple method for the isolation and  
590 purification of total lipids from animal tissues. *The Journal of Biological Chemistry*, 226(1),  
591 497–509.
- 592 28. AFNOR. (1984). Recueil de normes françaises des corps gras, graines oléagineuses, produits  
593 dérivés. Paris: Association française de normalisation.
- 594 29. Wiegand, I., Hilpert, K., & Hancock, R. E. W. (2008). Agar and broth dilution methods to  
595 determine the minimal inhibitory concentration (MIC) of antimicrobial substances. *Nature*  
596 *Protocols*, 3, 163–175. <https://doi.org/10.1038/nprot.2007.521>.
- 597 30. Finney, D. J. (1971). Probit analysis, 3<sup>rd</sup> edition, Cambridge University Press, Cambridge,  
598 UK.
- 599 31. Gema, H., Kavadia, A., Dimou, D., Tzagou, V., Komaitis, M., & Aggelis, G. (2002).  
600 Production of  $\gamma$ -linolenic acid by *Cunninghamella echinulata* cultivated on glucose and orange  
601 peels. *Applied Microbiology and Biotechnology*, 58, 303-307. [https://doi.org/10.1007/s00253-](https://doi.org/10.1007/s00253-001-0910-7)  
602 [001-0910-7](https://doi.org/10.1007/s00253-001-0910-7).

- 603 32. Papanikolaou, S., Komaitis, M., & Aggelis, G. (2004). Single cell oil (SCO) production by  
604 *Mortierella isabellina* grown on high sugar content media. *Bioresource Technology*, 95(3), 287–  
605 291. <https://doi.org/10.1016/j.biortech.2004.02.016>.
- 606 33. Subramaniam, R., Dufreche, S., Zappi, M., & Bajpai, R. (2010). Microbial lipids from  
607 renewable resources: production and characterization. *Journal of Industrial Microbiology &*  
608 *Biotechnology*, 37(12), 1271–1287. <https://doi.org/10.1007/s10295-010-0884-5>.
- 609 34. Dourou, M., Aggeli, D., Papanikolaou, S., & Aggelis, G. (2018). Critical steps in carbon  
610 metabolism affecting lipid accumulation and their regulation in oleaginous microorganisms.  
611 *Applied Microbiology and Biotechnology*, 102(6), 2509–2523. [https://doi.org/10.1007/s00253-](https://doi.org/10.1007/s00253-018-8813-z)  
612 [018-8813-z](https://doi.org/10.1007/s00253-018-8813-z).
- 613 35. Chatzifragkou, A., Fakas, S., Galiotou-Panayotou, M., Komaitis, M., Aggelis, G., &  
614 Papanikolaou, S. (2010). Commercial sugars as substrates for lipid accumulation in  
615 *Cunninghamella echinulata* and *Mortierella isabellina* fungi. *European Journal of Lipid Science*  
616 *and Technology*, 112(9), 1048–1057. <https://doi.org/10.1002/ejlt.201000027>.
- 617 36. Fakas, S., Papanikolaou, S., Batsos, A., Galiotou-Panayotou, M., Mallouchos, A., & Aggelis,  
618 G. (2009). Evaluating renewable carbon sources as substrates for single cell oil production by  
619 *Cunninghamella echinulata* and *Mortierella isabellina*. *Biomass and Bioenergy*, 33(4), 573–580.  
620 <https://doi.org/10.1016/j.biombioe.2008.09.006>.
- 621 37. Gotor-Fernández, V., Busto, E., & Gotor, V. (2006). *Candida antarctica* lipase B: an ideal  
622 biocatalyst for the preparation of nitrogenated organic compounds. *Advanced Synthesis &*  
623 *Catalysis*, 348(7-8), 797–812. <https://doi.org/10.1002/adsc.200606057>.

- 624 38. Tufvesson, P., Annerling, A., Hatti-Kaul, R., & Adlercreutz, D. (2007). Solvent-free  
625 enzymatic synthesis of fatty alkanolamides. *Biotechnology and Bioengineering*, 97(3), 447–453.  
626 <https://doi.org/10.1002/bit.21258>.
- 627 39. Al-Mulla, E. A. J., Yunus, W. M. Z. W., Ibrahim, N. A. B., & Rahman, M. Z. A. (2010).  
628 Enzymatic synthesis of fatty amides from palm olein. *Journal of Oleo Science*, 59(2), 59–64.  
629 <https://doi.org/10.5650/jos.59.59>.
- 630 40. Sharma, J., Batovska, D., Kuwamori, Y., & Asano, Y. (2005). Enzymatic chemoselective  
631 synthesis of secondary amide surfactant from N-methylethanol amine. *Journal of Bioscience and*  
632 *Bioengineering*, 100(6), 662–666. <https://doi.org/10.1263/jbb.100.662>.
- 633 41. Liu, K. J., Nag, A., & Shaw, J. F. (2001). Lipase-catalyzed synthesis of fatty acid  
634 diethanolamides. *Journal of Agricultural and Food Chemistry*, 49(12), 5761–5764.  
635 <https://doi.org/10.1021/jf0107858>.
- 636 42. Levinson, W. E., Kuo, T. M., & Kurtzman, C. P. (2005). Lipase catalyzed production of  
637 novel hydroxylated fatty amides in organic solvents. *Enzyme and Microbial Technology*, 37(1),  
638 126–130. <https://doi.org/10.1016/j.enzmictec.2005.02.001>.
- 639 43. Tremblay, H., St-Georges, C., Legault, M., Morin, C., Fortin, S., & Marsault, E. (2014). One-  
640 pot synthesis of polyunsaturated fatty acid amides with anti-proliferative properties. *Bioorganic*  
641 *& Medicinal Chemistry Letters*, 24(24), 5635–5638. <https://doi.org/10.1016/j.bmcl.2014.10.084>.
- 642 44. Mudiyansele, A. Y., Yao, H., Viamajala, S., Varanasi, S., & Yamamoto, K. (2015).  
643 Efficient production of alkanolamides from microalgae. *Industrial & Engineering Chemistry*  
644 *Research*, 54(16), 4060–4065. <https://doi.org/10.1021/ie503980g>.

- 645 45. Novak, A. F., Solar, J. M., Mod, R. R., Magne, F. C., & Skau, E. L. (1969). Antimicrobial  
646 activity of some N-substituted amides of long-chain fatty acids. *Applied Microbiology*, *18*(6),  
647 1050-1056.
- 648 46. Stevens, S., & Hofmeyr, J. H. S. (1993). Effects of ethanol, octanoic and decanoic acids on  
649 fermentation and the passive influx of protons through the plasma membrane of *Saccharomyces*  
650 *cerevisiae*. *Applied Microbiology and Biotechnology*, *38*, 656–663.  
651 <https://doi.org/10.1007/BF00182806>.
- 652 47. Shao, J., He, Y., Li, F., Zhang, H., Chen, A., Luo, S., & Gu, J. D. (2016). Growth inhibition  
653 and possible mechanism of oleamide against the toxin-producing cyanobacterium *Microcystis*  
654 *aeruginosa* NIES-843. *Ecotoxicology (London, England)*, *25*(1), 225–233.  
655 <https://doi.org/10.1007/s10646-015-1582-x>.
- 656 48. Powell, J. R. (2018). Mosquito-borne human viral diseases: Why *Aedes aegypti*? *The*  
657 *American Journal of Tropical Medicine and Hygiene*, *98*(6), 1563–1565.  
658 <https://doi.org/10.4269/ajtmh.17-0866>.
- 659 49. Rodrigues, A. M., Sampaio, C. de G., de Souza, J. S. N., Campos, A. R., da Silva, A. B. R.,  
660 de Moraes, S. M., & Martins, V. E. P. (2019). Different susceptibilities of *Aedes aegypti* and  
661 *Aedes albopictus* larvae to plant-derived products. *Revista da Sociedade Brasileira de Medicina*  
662 *Tropical*, *52*, e20180197. <https://doi.org/10.1590/0037-8682-0197-2018>.
- 663 50. Kannathasan, K., Senthikumar, A., Venkatesalu, V., & Chandrasekaran, M. (2008).  
664 Larvicidal activity of fatty acid methyl esters of *Vitex* species against *Culex quinquefasciatus*.  
665 *Parasitology Research*, *103*(4), 999–1001. <https://doi.org/10.1007/s00436-008-1078-1>.

- 666 51. Perumalsamy, H., Jang, M. J., Kim, J. R., Kadarkarai, M., & Ahn, Y. J. (2015). Larvicidal  
667 activity and possible mode of action of four flavonoids and two fatty acids identified in *Millettia*  
668 *pinnata* seed toward three mosquito species. *Parasites & Vectors*, 8, 237.  
669 <https://doi.org/10.1186/s13071-015-0848-8>.
- 670 52. Komalamisra, N., Trongtokit, Y., Rongsriyam, Y., & Apiwathnasorn, C. (2005). Screening  
671 for larvicidal activity in some Thai plants against four mosquito vector species. *The Southeast*  
672 *Asian Journal of Tropical Medicine and Public Health*, 36(6), 1412–1422.
- 673 53. Ravi Kiran, S., Bhavani, K., Sita Devi, P., Rajeswara Rao, B. R., & Janardhan Reddy, K.  
674 (2006). Composition and larvicidal activity of leaves and stem essential oils of *Chloroxylon*  
675 *swietenia* DC against *Aedes aegypti* and *Anopheles stephensi*. *Bioresource Technology*, 97(18),  
676 2481–2484. <https://doi.org/10.1016/j.biortech.2005.10.003>.
- 677 54. Magalhães, L. A., Lima, M., Marques, M. O., Facanali, R., Pinto, A. C., & Tadei, W. P.  
678 (2010). Chemical composition and larvicidal activity against *Aedes aegypti* larvae of essential  
679 oils from four *Guarea* species. *Molecules (Basel, Switzerland)*, 15(8), 5734–5741.  
680 <https://doi.org/10.3390/molecules15085734>.
- 681 55. Aguiar, R. W. S., dos Santos, S. F., da Silva Morgado, F., Ascencio, S. D., de Mendonça  
682 Lopes, M., Fernandes Viana, K., Didonet, J., & Ribeiro, B. M. (2015). Insecticidal and repellent  
683 activity of *Siparuna guianensis* Aubl. (Negramina) against *Aedes aegypti* and *Culex*  
684 *quinquefasciatus*. *PLOS ONE*, 10(2), e0116765. <https://doi.org/10.1371/journal.pone.0116765>.
- 685 56. Harada, K., Suomalainen, M., Uchida, H., Masui, H., Ohmura, K., Kiviranta, J.,  
686 Niku-Paavola, M. L., & Ikemoto, T. (2000). Insecticidal compounds against mosquito larvae



- 687 from *Oscillatoria agardhii* strain 27. *Environmental Toxicology*, 15(2), 114–119.  
688 [https://doi.org/10.1002/\(SICI\)1522-7278\(2000\)15:2<114::AID-TOX7>3.0.CO;2-P](https://doi.org/10.1002/(SICI)1522-7278(2000)15:2<114::AID-TOX7>3.0.CO;2-P).
- 689 57. Berry, J. P., Gantar, M., Perez, M. H., Berry, G., & Noriega, F. G. (2008). Cyanobacterial  
690 toxins as allelochemicals with potential applications as algaecides, herbicides and insecticides.  
691 *Marine Drugs*, 6(2), 117–146. <https://doi.org/10.3390/md20080007>.
- 692 58. Mizerakis, P., Stathopoulou, P., Tsiamis, G., Baeshen, M. N., Mahyoub, J. A., Elazzazy, A.  
693 M., Bellou, S., Sakoulogeorga, E., Triantaphyllidou, I. E., Mazioti, T., Katsoris, P., & Aggelis,  
694 G. (2017). Bacterial diversity of the outflows of a Polichnitos (Lesvos, Greece) hot spring,  
695 laboratory studies of a *Cyanobacterium* sp. strain and potential medical applications. *Annals of*  
696 *Microbiology*, 67, 643–654. <https://doi.org/10.1007/s13213-017-1293-z>.
- 697 59. Kim, S. I., & Ahn, Y. J. (2017). Larvicidal activity of lignans and alkaloid identified in  
698 *Zanthoxylum piperitum* bark toward insecticide-susceptible and wild *Culex pipiens pallens* and  
699 *Aedes aegypti*. *Parasites & Vectors*, 10(1), 221. <https://doi.org/10.1186/s13071-017-2154-0>.
- 700 60. dos Santos, D. S., Piovesan, L. A., D' Oca, C. R., Hack, C. R., Treptow, T. G., Rodrigues, M.  
701 O., Vendramini-Costa, D. B., Ruiz, A. L., de Carvalho, J. E., & D' Oca, M. G. (2015).  
702 Antiproliferative activity of synthetic fatty acid amides from renewable resources. *Bioorganic &*  
703 *Medicinal Chemistry*, 23(2), 340–347. <https://doi.org/10.1016/j.bmc.2014.11.019>.
- 704 61. Wall, R., Ross, R. P., Fitzgerald, G. F., & Stanton, C. (2010). Fatty acids from fish: the anti-  
705 inflammatory potential of long-chain omega-3 fatty acids. *Nutrition Reviews*, 68(5), 280–289.  
706 <https://doi.org/10.1111/j.1753-4887.2010.00287.x>.

- 707 62. Siddiqui, R. A., Harvey, K. A., Xu, Z., Bammerlin, E. M., Walker, C., & Altenburg, J. D.  
708 (2011). Docosahexaenoic acid: a natural powerful adjuvant that improves efficacy for anticancer  
709 treatment with no adverse effects. *BioFactors (Oxford, England)*, 37(6), 399–412.  
710 <https://doi.org/10.1002/biof.181>.
- 711 63. Allam-Ndoul, B., Guénard, F., Barbier, O., & Vohl, M. C. (2017). A study of the differential  
712 effects of eicosapentaenoic acid (EPA) and docosahexaenoic acid (DHA) on gene expression  
713 profiles of stimulated thp-1 macrophages. *Nutrients*, 9(5), 424.  
714 <https://doi.org/10.3390/nu9050424>.
- 715 64. Blanckaert, V., Ulmann, L., Mimouni, V., Antol, J., Brancquart, L., & Chénais, B. (2010).  
716 Docosahexaenoic acid intake decreases proliferation, increases apoptosis and decreases the  
717 invasive potential of the human breast carcinoma cell line MDA-MB-231. *International Journal*  
718 *of Oncology*, 36(3), 737–742. <https://doi.org/10.3892/ijco.00000549>.
- 719 65. Chen, H. W., Chao, C. Y., Lin, L. L., Lu, C. Y., Liu, K. L., Lii, C. K., & Li, C. C. (2013).  
720 Inhibition of matrix metalloproteinase-9 expression by docosahexaenoic acid mediated by heme  
721 oxygenase 1 in 12-O-tetradecanoylphorbol-13-acetate-induced MCF-7 human breast cancer  
722 cells. *Archives of Toxicology*, 87(5), 857–869. <https://doi.org/10.1007/s00204-012-1003-3>.
- 723 66. Ravacci, G. R., Brentani, M. M., Tortelli, T. C., Torrinhas, R. S., Santos, J. R., Logullo, A.  
724 F., & Waitzberg, D. L. (2015). Docosahexaenoic acid modulates a HER2-associated lipogenic  
725 phenotype, induces apoptosis, and increases trastuzumab action in HER2-overexpressing breast  
726 carcinoma cells. *BioMed Research International*, 2015, 838652.  
727 <https://doi.org/10.1155/2015/838652>.

- 728 67. Józwiak, M., Filipowska, A., Fiorino, F., & Struga, M. (2020). Anticancer activities of fatty  
729 acids and their heterocyclic derivatives. *European Journal of Pharmacology*, 871, 172937.  
730 <https://doi.org/10.1016/j.ejphar.2020.172937>.
- 731 68. Giordano, C., Plastina, P., Barone, I., Catalano, S., & Bonofiglio, D. (2020). n-3  
732 polyunsaturated fatty acid amides: new avenues in the prevention and treatment of breast cancer,  
733 *International Journal of Molecular Sciences*, 21(7), 2279. <https://doi.org/10.3390/ijms21072279>.
- 734 69. Burstein, S., & Salmonsén, R. (2008). Acylamido analogs of endocannabinoids selectively  
735 inhibit cancer cell proliferation. *Bioorganic & Medicinal Chemistry*, 16(22), 9644–9651.  
736 <https://doi.org/10.1016/j.bmc.2008.10.015>.

**Table 1** Biomass yield (x, g or mg/L) and lipid content (L/x, %) of the microorganisms used in this study as source of lipids. The cultures were performed in triplicate

| Microorganism                    | x                | L/x (%)    |
|----------------------------------|------------------|------------|
| <i>Cunninghamella echinulata</i> | 12.9 ± 0.9 g/L   | 30.0 ± 1.5 |
| <i>Umbelopsis isabellina</i>     | 13.2 ± 1.2 g/L   | 74.0 ± 0.8 |
| <i>Nannochloropsis gaditana</i>  | 313.9 ± 0.4 mg/L | 22.7 ± 0.1 |

**Table 2** Fatty acid composition of the methyl ester mixtures used as acyl-donors in the amide synthesis. Analyses were performed in three independent samples

| Source of lipid        | Fatty acid composition (% w/w) |              |       |              |              |              |              |              |              |              |        |
|------------------------|--------------------------------|--------------|-------|--------------|--------------|--------------|--------------|--------------|--------------|--------------|--------|
|                        | C16:0                          | C16:1<br>n-7 | C18:0 | C18:1<br>n-9 | C18:2<br>n-6 | C18:3<br>n-6 | C18:3<br>n-3 | C18:4<br>n-3 | C20:1<br>n-9 | C20:5<br>n-3 | Others |
| <i>Cunninghamella</i>  | 15.9                           | 2.0          | 7.9   | 44.0         | 13.0         | 12.8         | nd           | nd           | nd           | nd           | 4.4    |
| <i>echinulata</i>      | ± 0.7                          | ± 0.5        | ± 0.6 | ± 1.4        | ± 1.2        | ± 1.0        |              |              |              |              | ± 1.2  |
| <i>Umbelopsis</i>      | 22.1                           | 3.6          | 2.8   | 54.4         | 11.7         | 2.6          | nd           | nd           | nd           | nd           | 2.8    |
| <i>isabellina</i>      | ± 1.1                          | ± 0.4        | ± 0.4 | ± 4.1        | ± 0.9        | ± 0.3        |              |              |              |              | ± 0.7  |
| <i>Nannochloropsis</i> | 18.0                           | 20.4         | 0.7   | 13.7         | 5.7          | 0.8          | 0.8          | nd           | 7.2          | 25.0         | 7.7    |
| <i>gaditana</i>        | ± 0.7                          | ± 0.5        | ± 0.0 | ± 0.4        | ± 0.1        | ± 0.2        | ± 0.1        |              | ± 0.4        | ± 0.3        | ± 2.7  |
| Olive oil              | 12.2                           | 2.4          | 2.7   | 74.1         | 7.0          | nd           | 0.4          | nd           | nd           | nd           | 1.2    |
|                        | ± 1.2                          | ± 0.2        | ± 0.3 | ± 1.1        | ± 0.2        |              | ± 0.0        |              |              |              | ± 0.3  |
| EPA concentrate        | 0.5                            | 0.5          | 3.3   | 10.0         | 1.0          | 0.8          | 2.3          | 2.4          | 4.4          | 72.3         | 4.0    |
|                        | ± 0.0                          | ± 0.0        | ± 0.2 | ± 1.8        | ± 0.1        | ± 0.0        | ± 0.2        | ± 0.1        | ± 0.8        | ± 1.4        | ± 0.5  |

**Table 3** Synthesis of Olive oil-FAAs utilizing different immobilized lipases and different molar ratio of Olive oil FAMES: ethylene diamine

| Entry | Immobilized enzyme | FAME: Amine Ratio | Conversion (%) |
|-------|--------------------|-------------------|----------------|
| 1     | Novozym 435        | 1:2               | 31.15 ± 1.25   |
| 2     | Novozym 435        | 1:3               | 57.05 ± 2.95   |
| 3     | Novozym 435        | 1:4               | 76.30 ± 3.30   |
| 4     | Novozym 435        | 1:5               | 95.00 ± 4.15   |
| 5     | Lipase CR          | 1:2               | 39.02 ± 2.95   |
| 6     | Lipase CR          | 1:3               | 71.11 ± 4.55   |
| 7     | Lipase CR          | 1:4               | 89.50 ± 3.45   |
| 8     | Lipase CR          | 1:5               | 100.00 ± 4.83  |
| 9     | No catalyst        | 1:5               | 12.57 ± 0.43   |

**Table 4** Optimization of reaction conditions for Olive oil-FAAs synthesis utilizing Lipase CR

| Entry | Lipase CR<br>(wt, g) | Solvent          | Time<br>(h) | Conversion<br>(%) |
|-------|----------------------|------------------|-------------|-------------------|
| 1     | 0.05                 | Acetone          | 30          | 82.09 ± 2.15      |
| 2     | 0.10                 | Acetone          | 24          | 100.04 ± 3.48     |
| 3     | 0.15                 | Acetone          | 24          | 99.13 ± 4.22      |
| 4     | 0.10                 | t-butyl alcohol  | 30          | 98.95 ± 4.78      |
| 5     | 0.10                 | Iso-amyl alcohol | 30          | 100.20 ± 3.45     |

**Table 5** Synthesis of FAAs by Lipase CR in acetone medium utilizing FAMES of different origin

| Entry | Source of FAMES                  | Time (h) | Conversion (%) |
|-------|----------------------------------|----------|----------------|
| 1     | <i>Cunninghamella echinulata</i> | 24       | 90.23 ± 2.51   |
| 2     | <i>Umbelopsis isabellina</i>     | 18       | 95.36 ± 5.75   |
| 3     | <i>Nannochloropsis gaditana</i>  | 18       | 90.95 ± 1.50   |
| 4     | EPA concentrate                  | 18       | 100.05 ± 3.00  |



**Table 6** The antimicrobial activity of FAAs against pathogenic strains. Data represent the mean of the diameter of the inhibition zones of three replicates  $\pm$ SD. The concentration of FAAs used to determine the diameter of the inhibition zones was 4 mg/mL

|                                                  | Source of FAAs                   |                              |                                 |                  |                  |
|--------------------------------------------------|----------------------------------|------------------------------|---------------------------------|------------------|------------------|
|                                                  | <i>Cunninghamella echinulata</i> | <i>Umbelopsis isabellina</i> | <i>Nannochloropsis gaditana</i> | Olive oil        | EPA concentrate  |
|                                                  | Inhibition zone (mm)             |                              |                                 |                  |                  |
| <i>Escherichia coli</i><br>(ATCC 25922)          | 9.00 $\pm$ 1.00                  | 17.00 $\pm$ 0.00             | 16.1 $\pm$ 1.01                 | 15.67 $\pm$ 1.15 | 14.0 $\pm$ 0.00  |
| <i>Klebsiella pneumoniae</i><br>(ATCC 700603)    | 10.33 $\pm$ 0.58                 | 16.00 $\pm$ 0.00             | 14.3 $\pm$ 0.15                 | 13.57 $\pm$ 0.81 | 12.57 $\pm$ 0.11 |
| <i>Salmonella typhimurium</i><br>(ATCC 14028)    | 9.33 $\pm$ 0.58                  | 19.00 $\pm$ 0.0              | 17.33 $\pm$ 0.57                | 14.67 $\pm$ 1.15 | 16.00 $\pm$ 0.00 |
| <i>Pseudomonas aeruginosa</i><br>(ATCC 15442)    | 12.00 $\pm$ 1.00                 | 20.00 $\pm$ 0.5              | 18.00 $\pm$ 0.00                | 17.67 $\pm$ 0.57 | 20.00 $\pm$ 1.00 |
| <i>Bacillus subtilis</i><br>(ATCC 6633)          | 14.17 $\pm$ 0.29                 | 17.00 $\pm$ 0.17             | 9.00 $\pm$ 0.00                 | 12.17 $\pm$ 1.28 | 17.00 $\pm$ 1.00 |
| MRSA <i>Staphylococcus aureus</i><br>(ATCC 4330) | 0.00 $\pm$ 0.00                  | 0.00 $\pm$ 0.00              | 15.50 $\pm$ 0.50                | 13.67 $\pm$ 1.15 | 19.00 $\pm$ 1.00 |
| <i>Staphylococcus aureus</i><br>(ATCC 25923)     | 9.17 $\pm$ 0.29                  | 22.00 $\pm$ 0.5              | 21.00 $\pm$ 0.86                | 15.00 $\pm$ 0.00 | 20.00 $\pm$ 2.00 |
| <i>Candida albicans</i><br>(ATCC 10231)          | 16.00 $\pm$ 2.00                 | 21.00 $\pm$ 1.8              | 19.00 $\pm$ 0.5                 | 18.07 $\pm$ 0.11 | 18.07 $\pm$ 0.11 |

**Table 7** Determination of minimum inhibitory concentration (MIC,  $\mu\text{g/mL}$ ) and minimum bactericidal concentration (MBC,  $\mu\text{g/mL}$ ) of FAAs against pathogenic strains

| Test organisms                               | Source of FAAs        |                       |                      |                      |                        |                      |                      |                      |                      |                      |
|----------------------------------------------|-----------------------|-----------------------|----------------------|----------------------|------------------------|----------------------|----------------------|----------------------|----------------------|----------------------|
|                                              | <i>Cunninghamella</i> |                       | <i>Umbelopsis</i>    |                      | <i>Nannochloropsis</i> |                      | Olive oil            |                      | EPA concentrate      |                      |
|                                              | <i>echinulata</i>     |                       | <i>isabellina</i>    |                      | <i>gaditana</i>        |                      |                      |                      | oil                  |                      |
|                                              | MIC                   | MBC                   | MIC                  | MBC                  | MIC                    | MBC                  | MIC                  | MBC                  | MIC                  | MBC                  |
| <i>Klebsiella pneumoniae</i><br>ATCC 700603  | 200.00<br>$\pm 0.00$  | 200.00 $\pm$<br>0.00  | 50.00 $\pm$<br>0.00  | 200.00 $\pm$<br>0.00 | 50.00 $\pm$<br>0.00    | 200.00 $\pm$<br>0.00 | 83.33 $\pm$<br>28.87 | 200.00 $\pm$<br>0.00 | 50.00 $\pm$<br>0.00  | 100.00 $\pm$<br>0.00 |
| <i>Pseudomonas aeruginosa</i><br>ATCC 15442  | 100.00<br>$\pm 0.00$  | 183.33 $\pm$<br>28.87 | 50.00 $\pm$<br>0.00  | 100.00 $\pm$<br>0.00 | 50.00 $\pm$<br>0.00    | 200.00 $\pm$<br>0.00 | 25.00 $\pm$<br>0.00  | 100.00 $\pm$<br>0.00 | 100.00 $\pm$<br>0.00 | 200.00 $\pm$<br>0.00 |
| <i>Bacillus subtilis</i><br>(ATCC 6633)      | 66.67 $\pm$<br>28.87  | 200.00 $\pm$<br>0.00  | 66.67 $\pm$<br>28.87 | 100.00 $\pm$<br>0.00 | 200.00 $\pm$<br>0.00   | 200.00 $\pm$<br>0.00 | 25.00 $\pm$<br>0.00  | 100.00 $\pm$<br>0.00 | 25.00 $\pm$<br>0.00  | 50.00 $\pm$<br>0.00  |
| <i>Staphylococcus aureus</i><br>(ATCC 25923) | 100.00<br>$\pm 0.00$  | 200.00 $\pm$<br>0.00  | 83.33 $\pm$<br>28.87 | 100.00 $\pm$<br>0.00 | 50.00 $\pm$<br>0.00    | 200.00 $\pm$<br>0.00 | 100.00 $\pm$<br>0.00 | 100.00 $\pm$<br>0.00 | 50.00 $\pm$<br>0.00  | 100.00 $\pm$<br>0.00 |

**Table 8** Susceptibility of *Aedes aegypti* larvae to FAAs under laboratory conditions by using dipping methods. Data represent the mean of six replicates

| Source of FAAs                   | LC50<br>(mg/L) | Lower<br>limit | Upper<br>limit | RR     |
|----------------------------------|----------------|----------------|----------------|--------|
| <i>Cunninghamella echinulata</i> | 0.294          | 0.258          | 0.332          | 1.00   |
| <i>Umbelopsis isabellina</i>     | 38.837         | 34.29          | 43.588         | 132.10 |
| <i>Nannochloropsis gaditana</i>  | 10.073         | 5.481          | 23.647         | 34.26  |
| Olive oil                        | 5.391          | 4.228          | 6.685          | 18.34  |
| EPA concentrate                  | 6.039          | 2.592          | 10.733         | 20.54  |

## Figure Captions

**Fig. 1** Amidation reaction of ethylene diamine and FAMES catalyzed by lipase

**Fig. 2** *In situ* NMR monitoring for % conversion of Olive oil FAMES to amide

**Fig. 3** FT-IR analysis of Olive oil FAMES and its amide

**Fig. 4** % conversion of Olive oil FAMES to amide in different ratios of Olive oil FAMES:  
ethylene diamine

**Fig. 5** FT-IR analysis of EPA concentrate FAMES and its amide

**Fig. 6** FT-IR analysis of *Umbelopsis isabellina* FAMES and its amide

**Fig. 7** The larval mortality effect of FAAs of *C echinulata*, *U isabellina*, *N gaditana*, Olive oil and EPA concentrate at different concentrations against *Aedes aegypti* after continuous exposure for 48 hours

**Fig. 8** Effect of compounds on SKOV-3 cell apoptosis. Flow cytometry analysis of apoptosis in SKOV-3 cells either untreated or treated with 10 µg/mL of every compounds for 48h. After the treatment period, the cells were stained with Annexin FITC and subsequently analyzed by flow cytometry

**Abbreviations:** *C. echinulata* – FAAs: *C.e.* – FAAs; *U. isabellina* – FAAs: *U.i.* – FAAs; *N. gaditana* – FAAs: *N.g.* – FAAs; Olive oil – FAAs; O.o. – FAAs; EPA concentrate – FAAs: EPA – FAAs

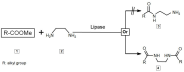

time = 24h

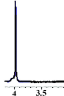

time = 18h

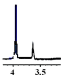

time = 12h

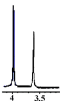

New signal due to 2 sym. methylene group

time = 6h

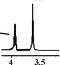

Methyl group of Olive oil FAME

time = 0h

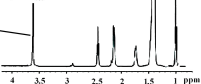

## FT-IR of FAA

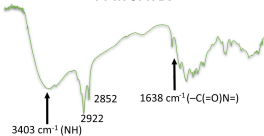

## FT-IR of olive oil methyl ester

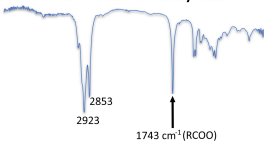

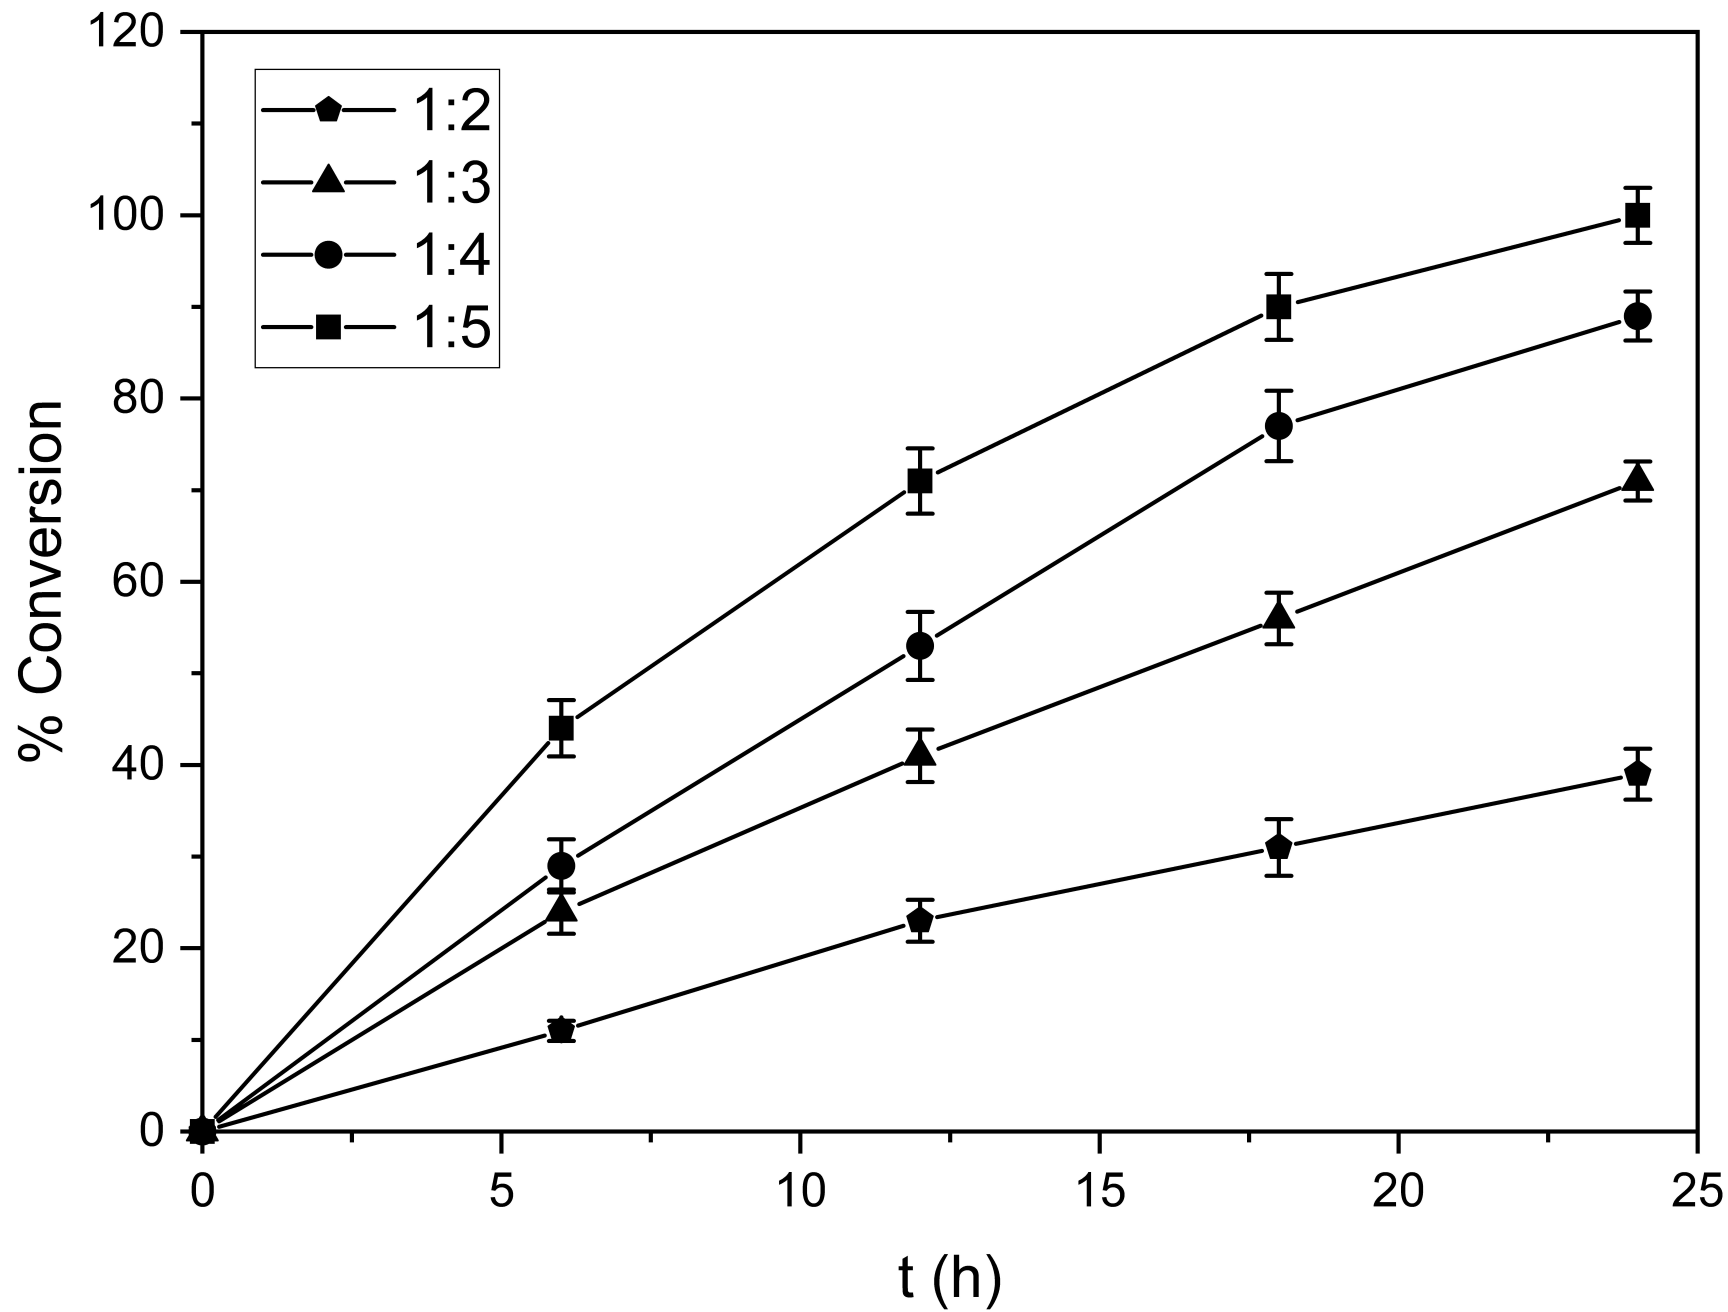



## FT-IR of FAA

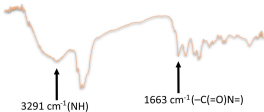

## FT-IR of EPA concentrate methyl ester

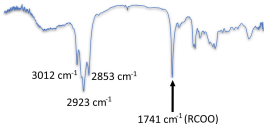

## FT-IR of FAA

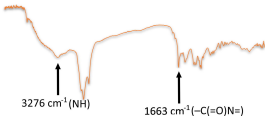

## FT-IR of *Umbelopsis isabellina* methyl ester

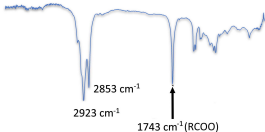

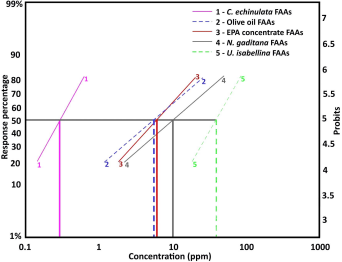

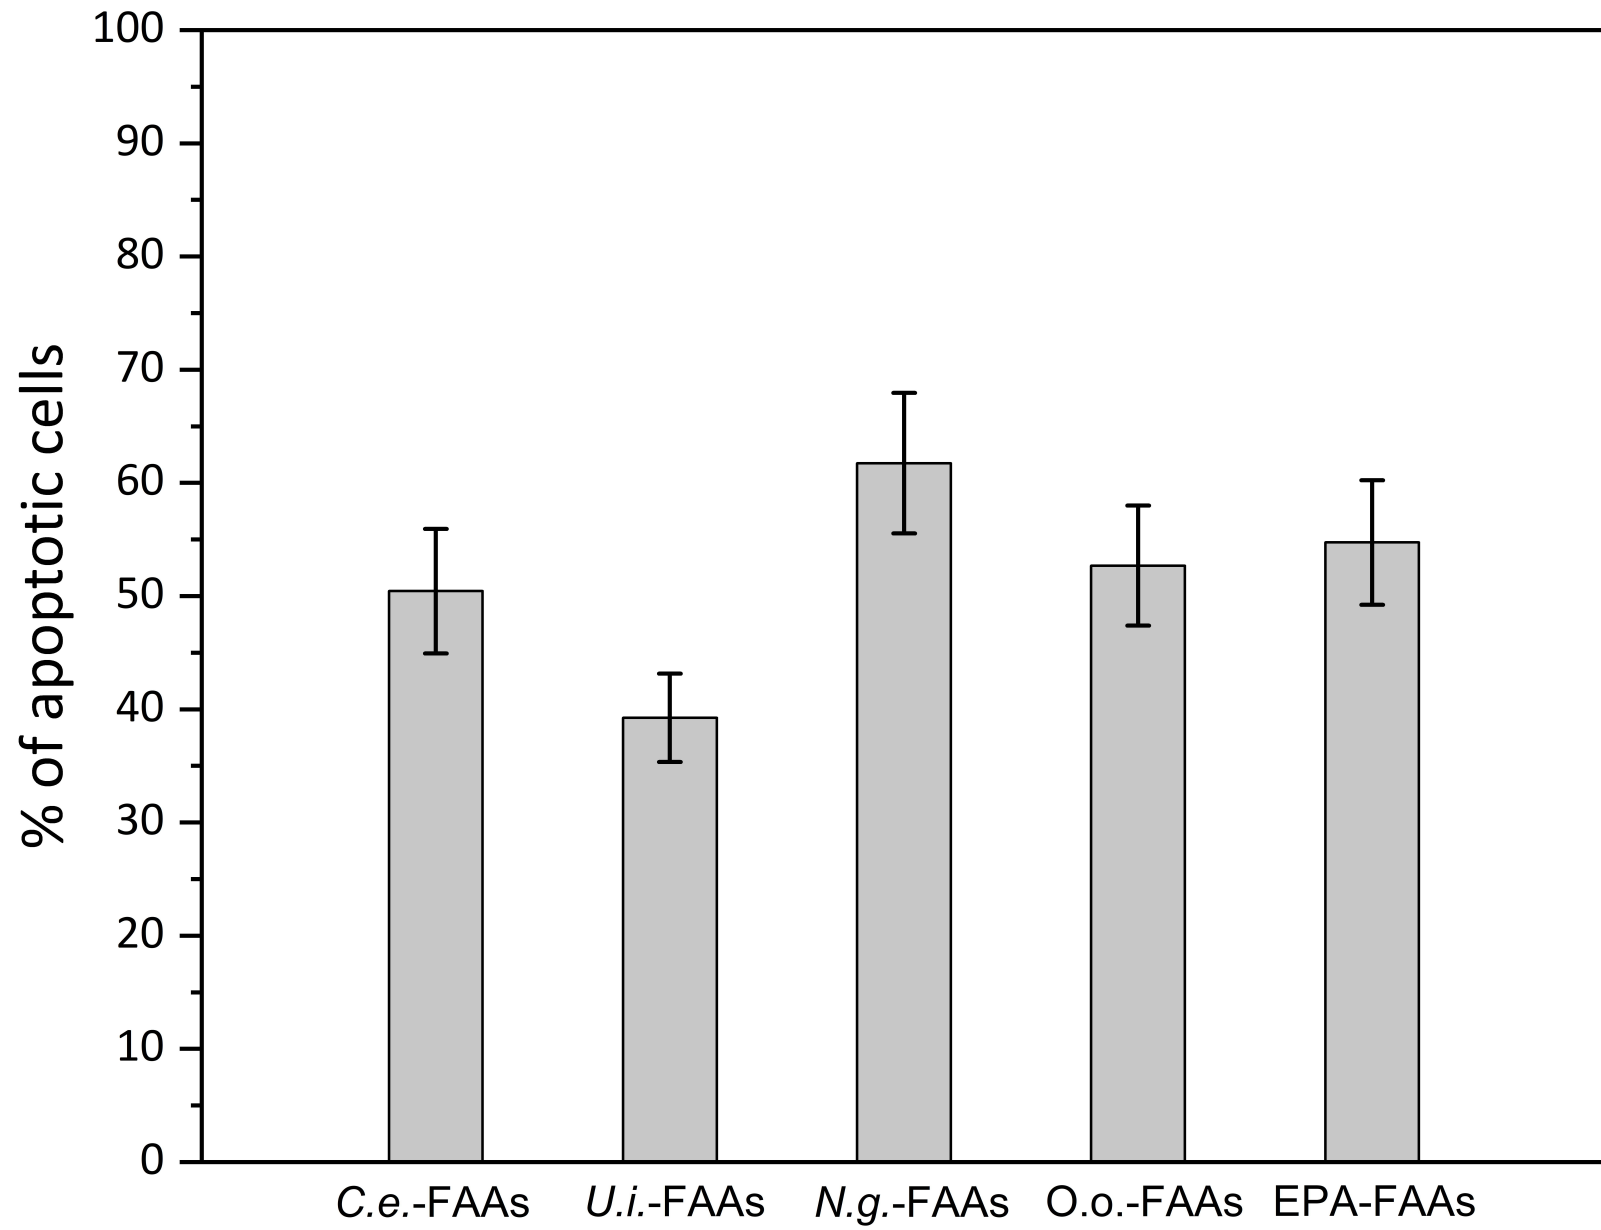

Source: https://www.biorxiv.org/content/biorxiv/early/2020/09/13/2020.09.13.295113.full.pdf
